# Supplementary material
Source: Research Square preprint supplement (doi:10.21203/rs.3.rs-9000922/v1)
Supplement: Supplementary file 2 [file 9be9a675c436908466052de3.docx]

Additional file 1:

Assessment scale of the independent learning ability of nursing major college students

In the survey of independent learning, there are 5 options in the following situation, which are: "fully consistent", "more consistent", "uncertain", "more inconsistent", "and" completely inconsistent ". Please draw" " on the options according to your actual situation.

|  | completely inconsistent | more inconsistent | uncertain | more consistent | fully consistent |
| --- | --- | --- | --- | --- | --- |
| 1.I often set my learning goals | 口 | 口 | 口 | 口 | 口 |
| 2.I know how to achieve the goal I set | 口 | 口 | 口 | 口 | 口 |
| 3.I can always complete the scheduled tasks within the specified time | 口 | 口 | 口 | 口 | 口 |
| 4.I often have no deadline on when I can finish my work | 口 | 口 | 口 | 口 | 口 |
| 5.In order to improve my time utilization, I often learn how to use my time effectively | 口 | 口 | 口 | 口 | 口 |
| 6.In the process of learning, I will combine work and rest | 口 | 口 | 口 | 口 | 口 |
| 7.I will consciously collect and sort out some useful information | 口 | 口 | 口 | 口 | 口 |
| 8.When I encounter problems, I can always quickly find the information I need and solve them | 口 | 口 | 口 | 口 | 口 |
| 9.It is difficult for me to adapt to the college study life | 口 | 口 | 口 | 口 | 口 |
| 10.Compared with the other students in the class, my learning ability is excellent | 口 | 口 | 口 | 口 | 口 |
| 11.I'm sure I can understand what this class was about | 口 | 口 | 口 | 口 | 口 |
| 12.I found that when the teacher lectured, I always thought about other things and did not listen to what the teacher said | 口 | 口 | 口 | 口 | 口 |
| 13.Even if the study content is boring, I will finish it | 口 | 口 | 口 | 口 | 口 |
| 14.Although I don't like what I learned in class, I study hard in order to get a good score | 口 | 口 | 口 | 口 | 口 |
| 15.I like some difficult learning content, so that I can learn something new | 口 | 口 | 口 | 口 | 口 |
| 16.When studying, I struggled to grasp the key points | 口 | 口 | 口 | 口 | 口 |
| 17.When I encounter difficulties in learning, I can take the initiative to seek help from my teachers and classmates | 口 | 口 | 口 | 口 | 口 |
| 18.I think I can finish the homework and tasks assigned by the teacher excellently | 口 | 口 | 口 | 口 | 口 |
| 19.I can often finish my homework ahead of schedule | 口 | 口 | 口 | 口 | 口 |
| 20.I always finish the tasks assigned by the teacher at the last minute | 口 | 口 | 口 | 口 | 口 |
| 21.I often prepare for tomorrow's study content in advance | 口 | 口 | 口 | 口 | 口 |
| 22.After learning for a while, I will sort out the key points of knowledge and form my own review materials | 口 | 口 | 口 | 口 | 口 |
| 23.When preparing for the exam, I combined the information I learned in class with the content of the textbook | 口 | 口 | 口 | 口 | 口 |
| 24.For exams, I always worry about not doing well | 口 | 口 | 口 | 口 | 口 |
| 25.When I take the exam, I will feel very nervous if I can't recall what I have learned | 口 | 口 | 口 | 口 | 口 |
| 26.I think it's important to have a learning method suitable for me | 口 | 口 | 口 | 口 | 口 |
| 27.I often record my actual situation and adjust my learning methods | 口 | 口 | 口 | 口 | 口 |
| 28.Others ask me for advice on learning experience, and I can always say one or two points | 口 | 口 | 口 | 口 | 口 |
